**S2 Table. Latent variable correlations in six-factor Anhedonia model**

|                  | Intrusive | Avoidance | NegAffect | Anhedonia | DysArous1 | AnxArous |
|------------------|-----------|-----------|-----------|-----------|-----------|----------|
| <b>Intrusive</b> | 1.000     |           |           |           |           |          |
| <b>Avoidance</b> | 0.902     | 1.000     |           |           |           |          |
| <b>NegAffect</b> | 0.853     | 0.789     | 1.000     |           |           |          |
| <b>Anhedonia</b> | 0.716     | 0.696     | 0.869     | 1.000     |           |          |
| <b>DysArous1</b> | 0.810     | 0.738     | 0.919     | 0.926     | 1.000     |          |
| <b>AnxArous</b>  | 0.812     | 0.783     | 0.823     | 0.779     | 0.865     | 1.000    |
