**S3 Table. Latent variable correlations in seven-factor Hybrid model**

|                  | Intrusive | Avoidance | NegAffect | Anhedonia | DysArous2 | ExtBehav | AnxArous |
|------------------|-----------|-----------|-----------|-----------|-----------|----------|----------|
| <b>Intrusive</b> | 1.000     |           |           |           |           |          |          |
| <b>Avoidance</b> | 0.902     | 1.000     |           |           |           |          |          |
| <b>NegAffect</b> | 0.853     | 0.789     | 1.000     |           |           |          |          |
| <b>Anhedonia</b> | 0.716     | 0.696     | 0.869     | 1.000     |           |          |          |
| <b>DysArous2</b> | 0.789     | 0.731     | 0.853     | 0.855     | 1.000     |          |          |
| <b>ExtBehav</b>  | 0.799     | 0.707     | 0.965     | 0.979     | 0.929     | 1.000    |          |
| <b>AnxArous</b>  | 0.812     | 0.783     | 0.823     | 0.779     | 0.854     | 0.820    | 1.000    |
